# Supplementary material
Source: PubMed Central journal article supplement (PMC8018382)

Fig 1E

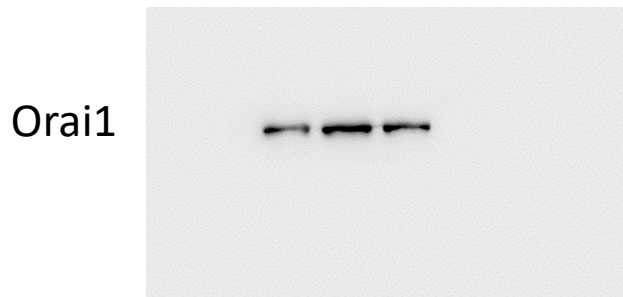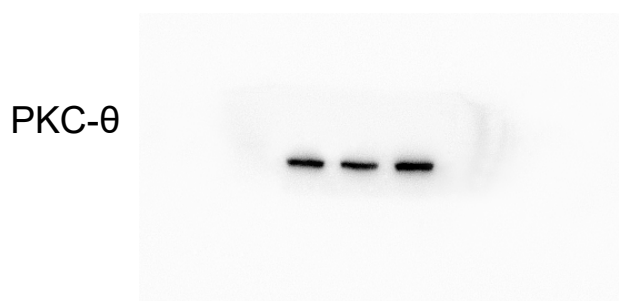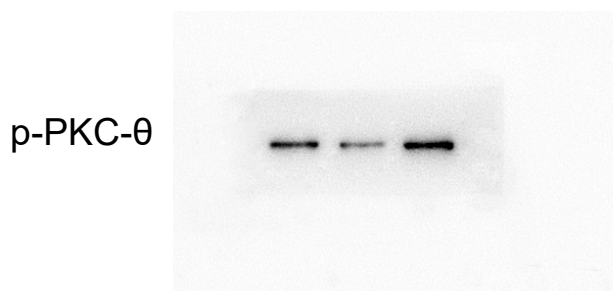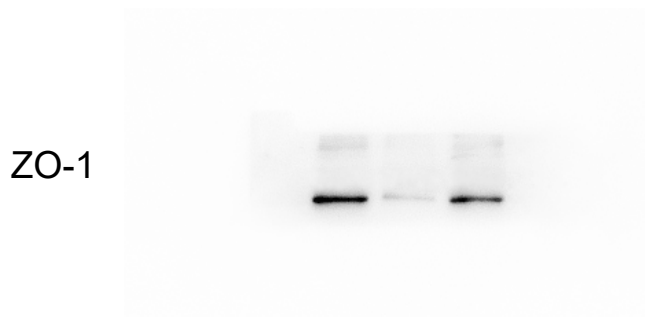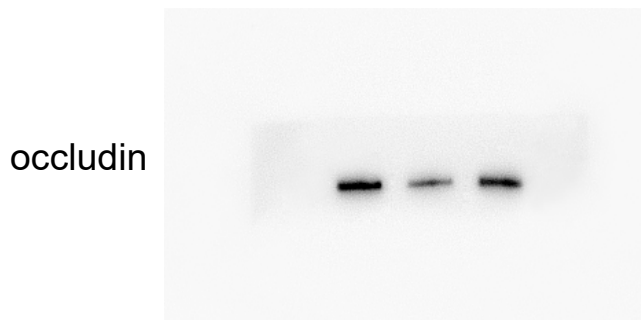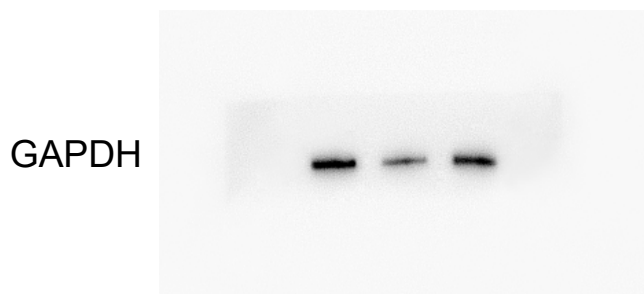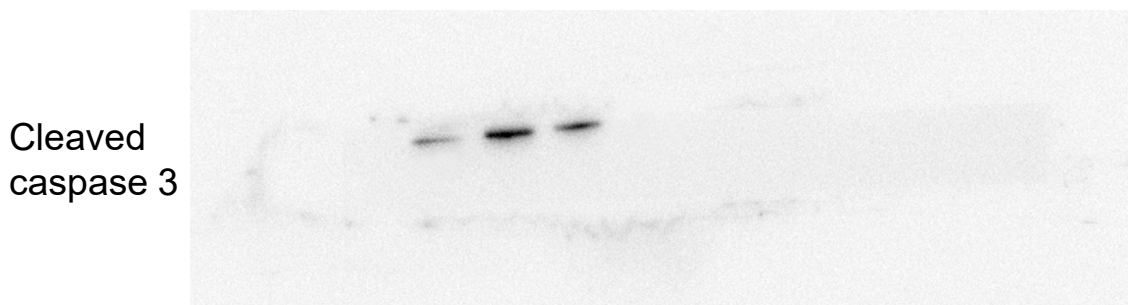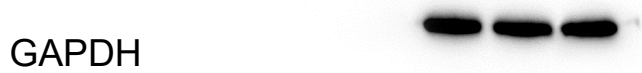

Fig 2E

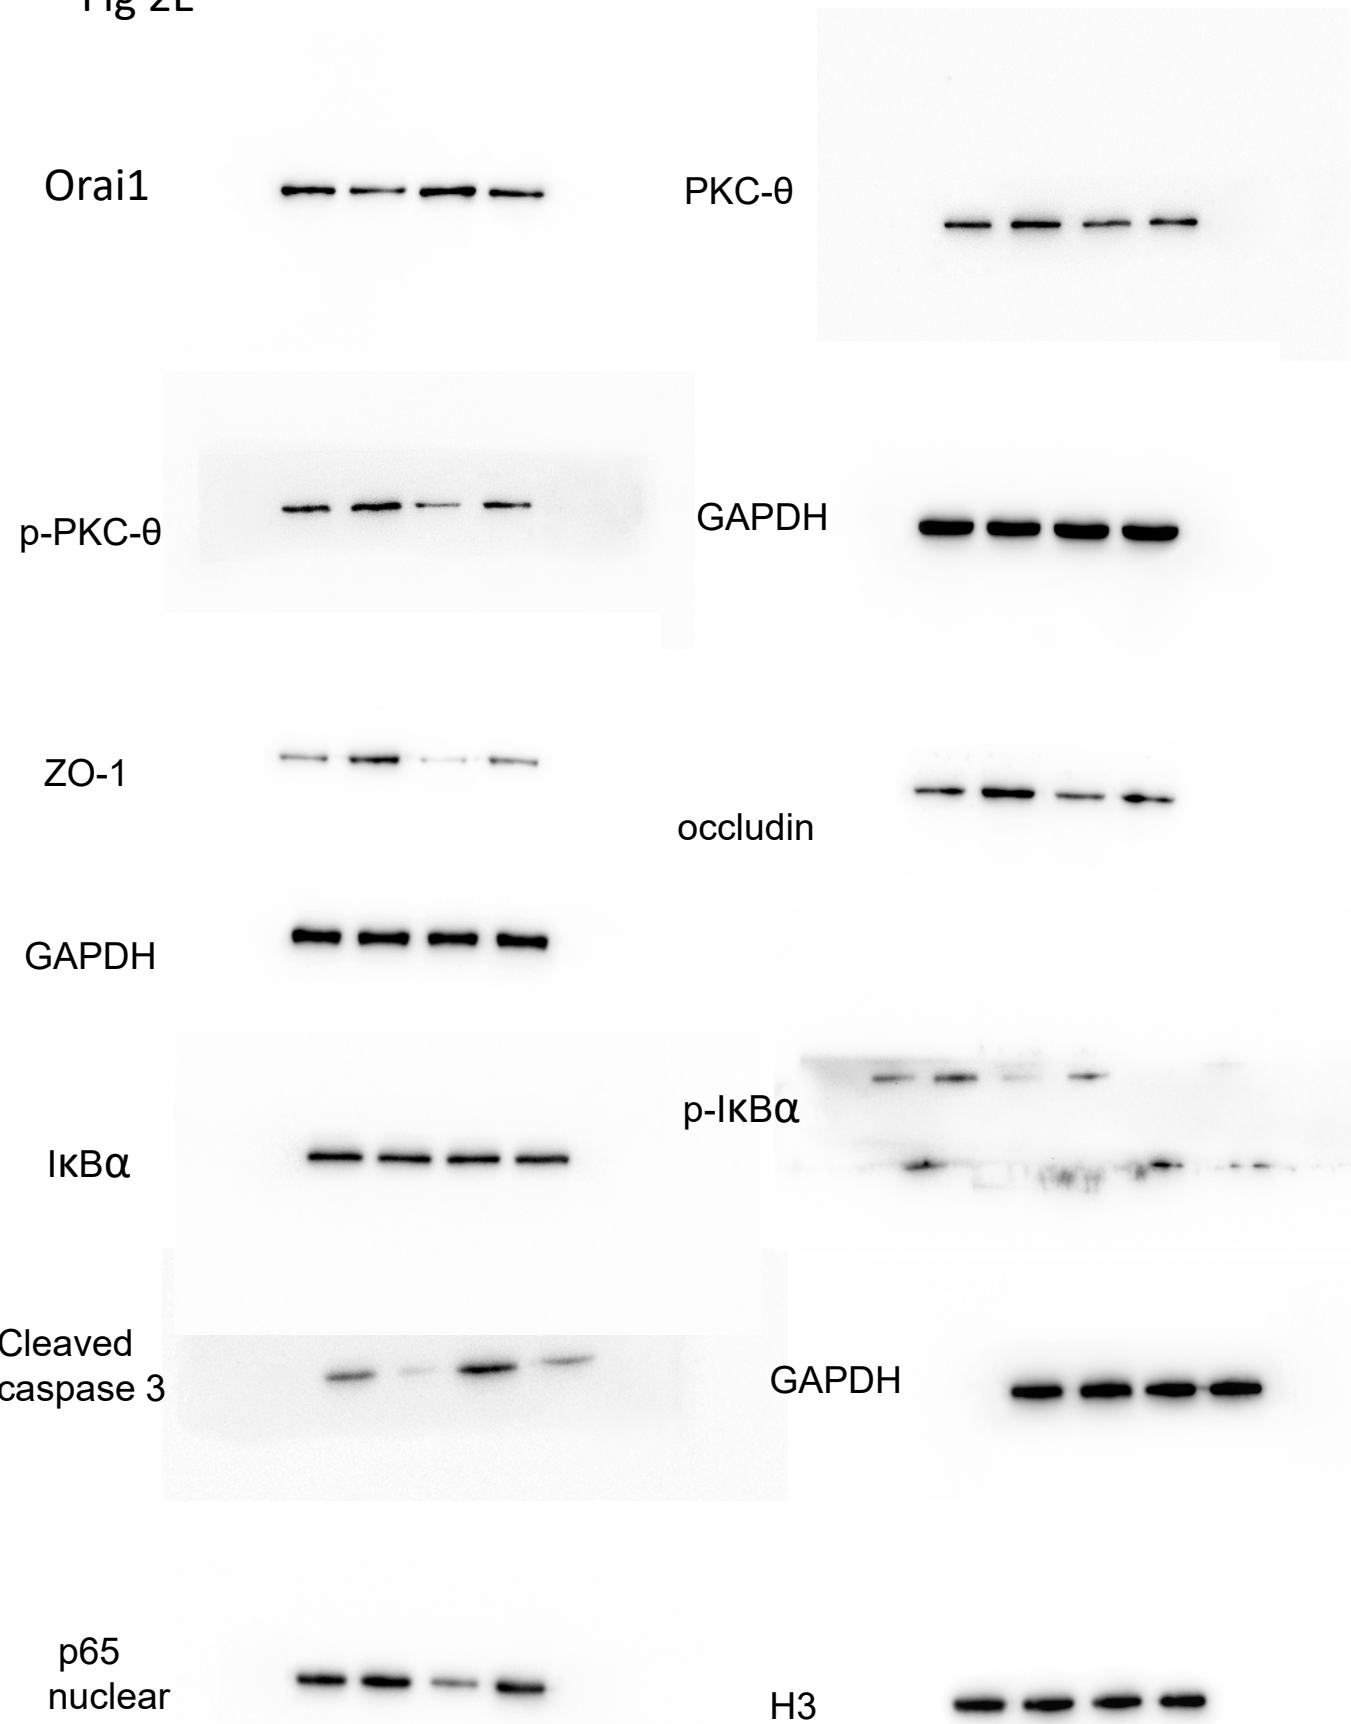

Fig 3E

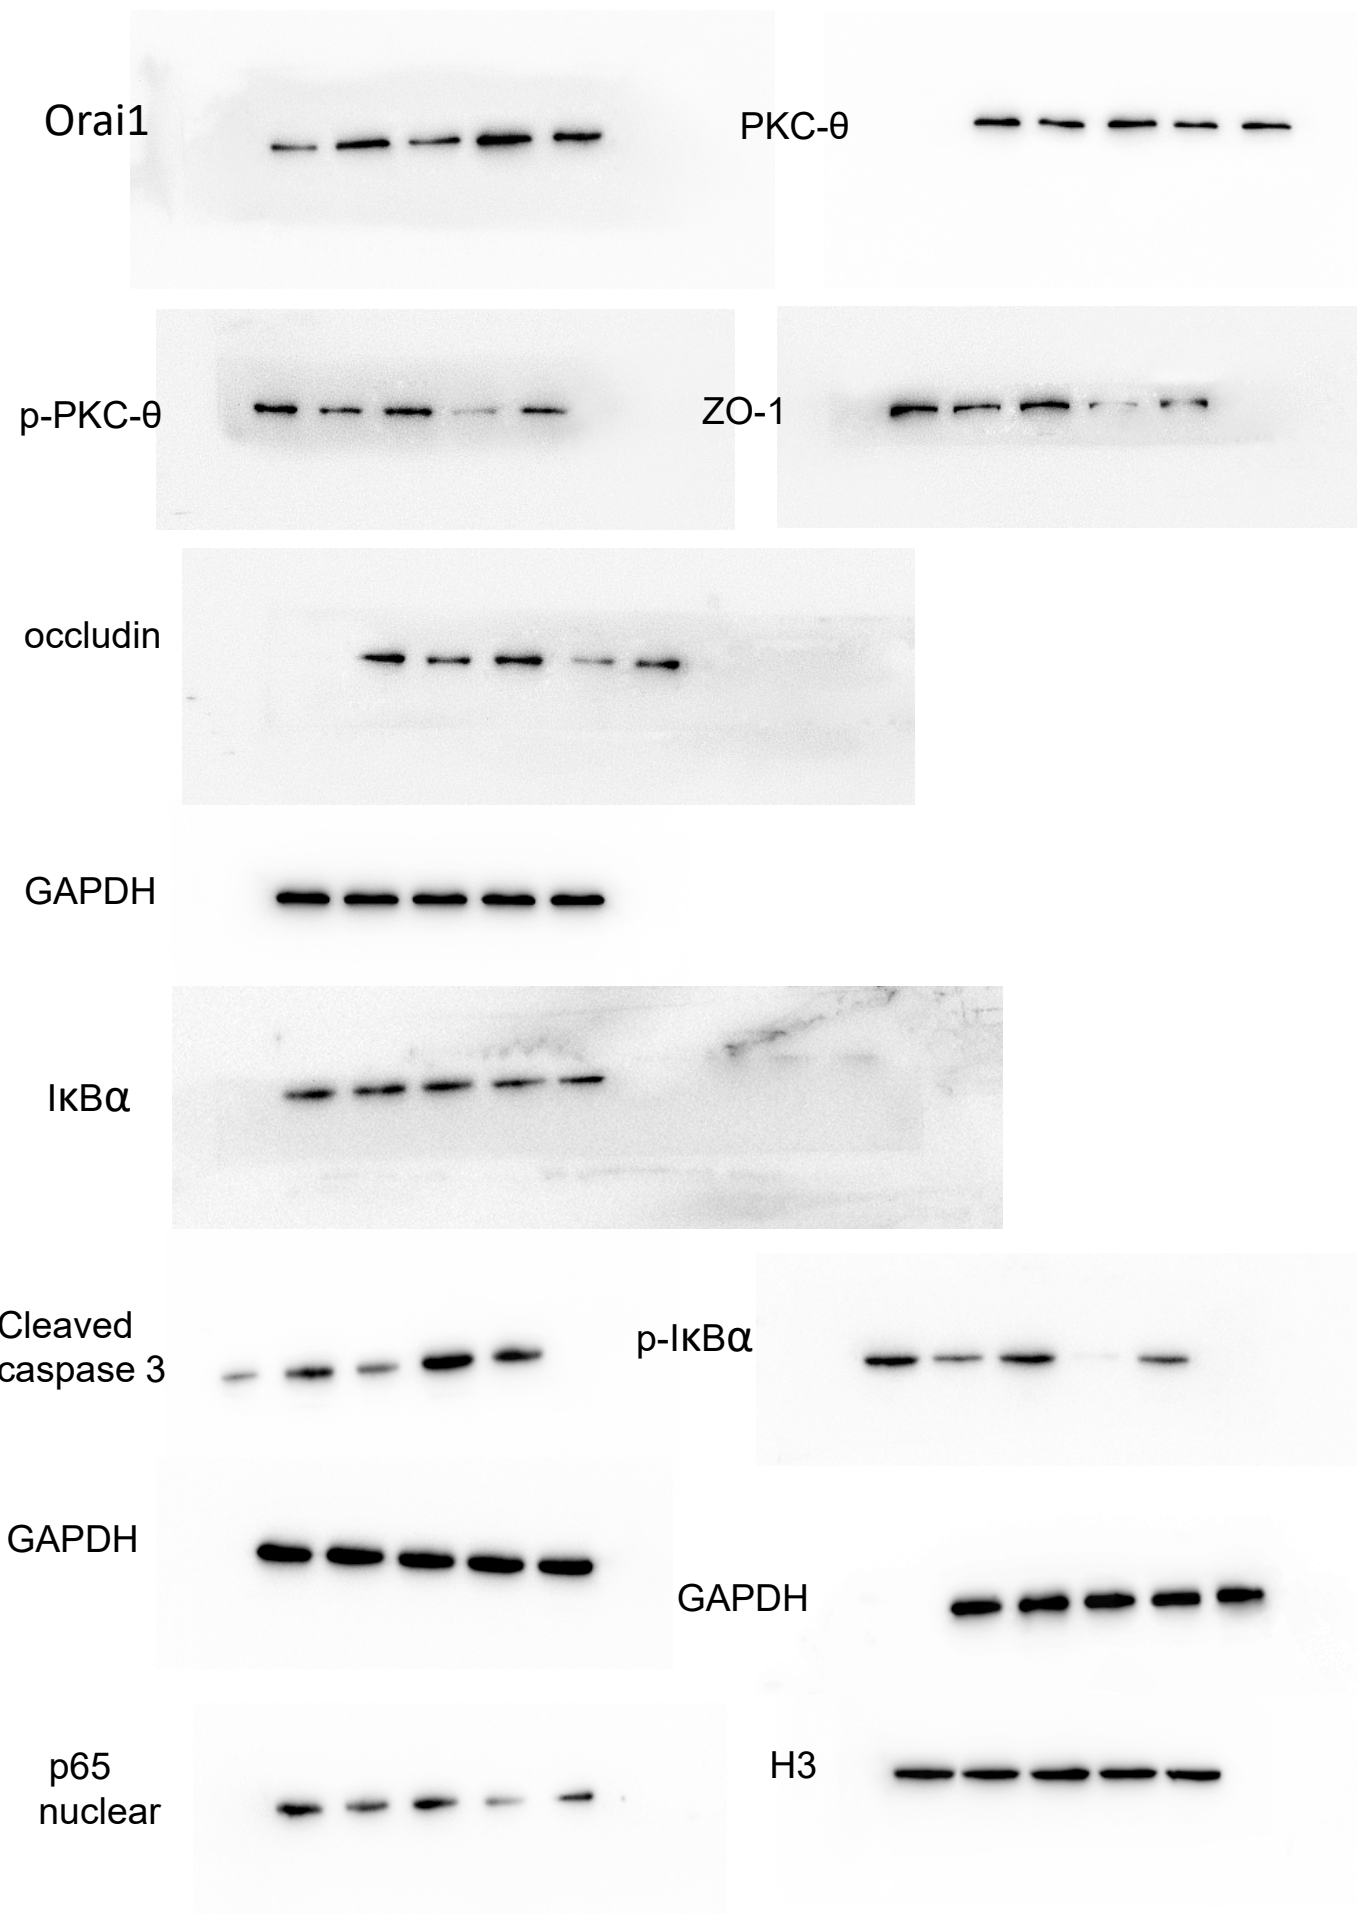

Supplement: KCCY_A_1889188_SM8623.pdf [file KCCY_A_1889188_SM8623.pdf]
